# Supplementary material for: Chalinulasterol, a Chlorinated Steroid Disulfate from the Caribbean Sponge Chalinula molitba. Evaluation of Its Role as PXR Receptor Modulator
Source: PubMed Central journal article supplement (PMC3397446; doi:10.3390/md10061383), 2012-06-14
Supplement: marinedrugs-10-01383-s001.pdf [file marinedrugs-10-01383-s001.pdf]

## Electronic Supplementary Information

### Table of contents

|                                                                                    |   |
|------------------------------------------------------------------------------------|---|
| Figure S1. Negative-ion ESI mass spectrum of chalinulasterol ( <b>1</b> ) .....    | 2 |
| Figure S2. Positive-ion ESI mass spectrum of chalinulasterol ( <b>1</b> ) .....    | 2 |
| Figure S3. Positive-ion ESI MS/MS spectrum of chalinulasterol ( <b>1</b> ) .....   | 3 |
| Figure S4. <sup>1</sup> H-NMR spectrum of chalinulasterol ( <b>1</b> ) .....       | 3 |
| Figure S5. COSY spectrum of chalinulasterol ( <b>1</b> ) .....                     | 4 |
| Figure S6. HSQC spectrum of chalinulasterol ( <b>1</b> ) – low-field region .....  | 5 |
| Figure S7. HSQC spectrum of chalinulasterol ( <b>1</b> ) – high-field region ..... | 6 |
| Figure S8. HMBC spectrum of chalinulasterol ( <b>1</b> ) .....                     | 7 |
| Figure S9. ROESY spectrum of chalinulasterol ( <b>1</b> ) .....                    | 8 |

Chalinosterol #109 RT: 0.57 AV: 1 NL: 3.17E7  
T: FTMS - c ESI Full ms [125.00-1000.00]

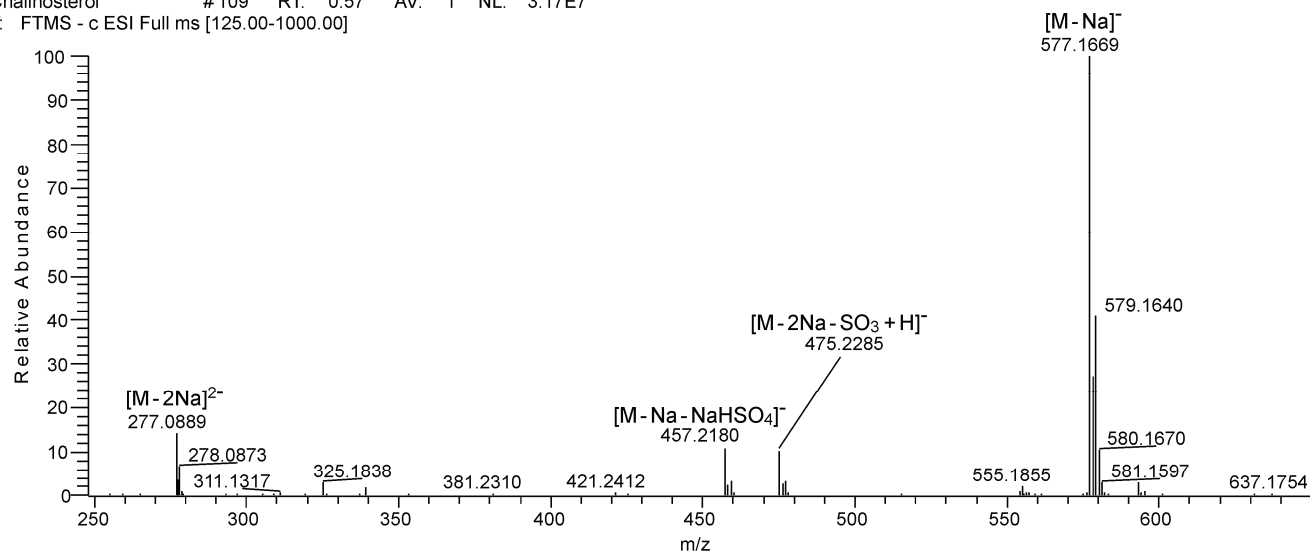

Figure S1. Negative-ion ESI MS spectrum of chalinulasterol (1)

Chalinosterol #135-142 RT: 0.77-0.96 AV: 8 NL: 1.43E6  
T: FTMS + p ESI Full ms [150.00-1500.00]

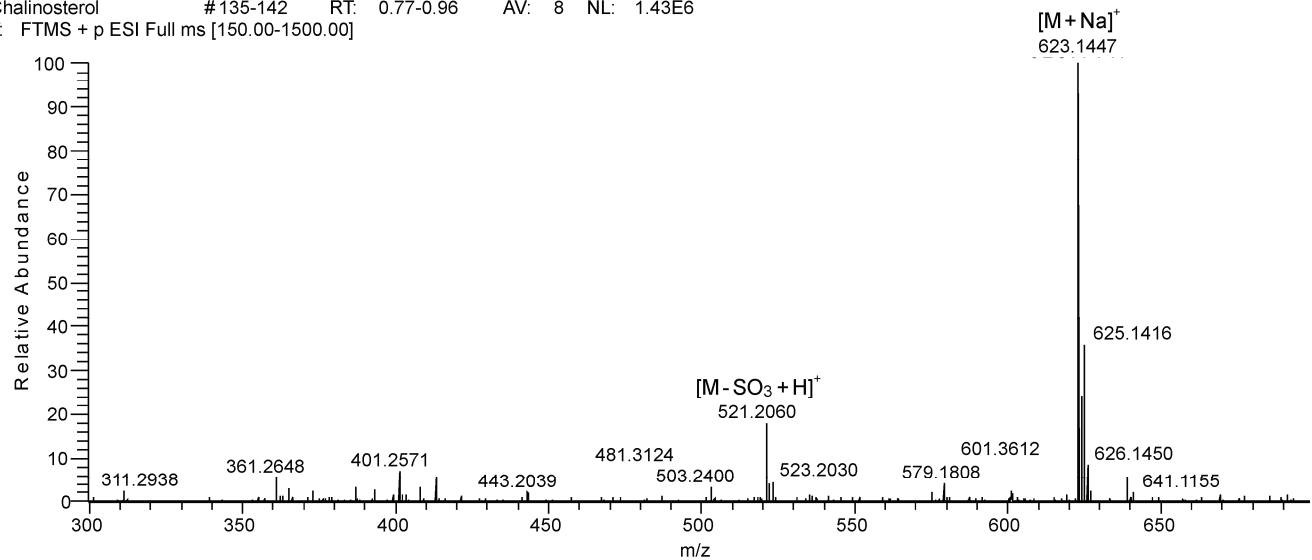

Figure S2. Positive-ion ESI MS spectrum of chalinulasterol (1)

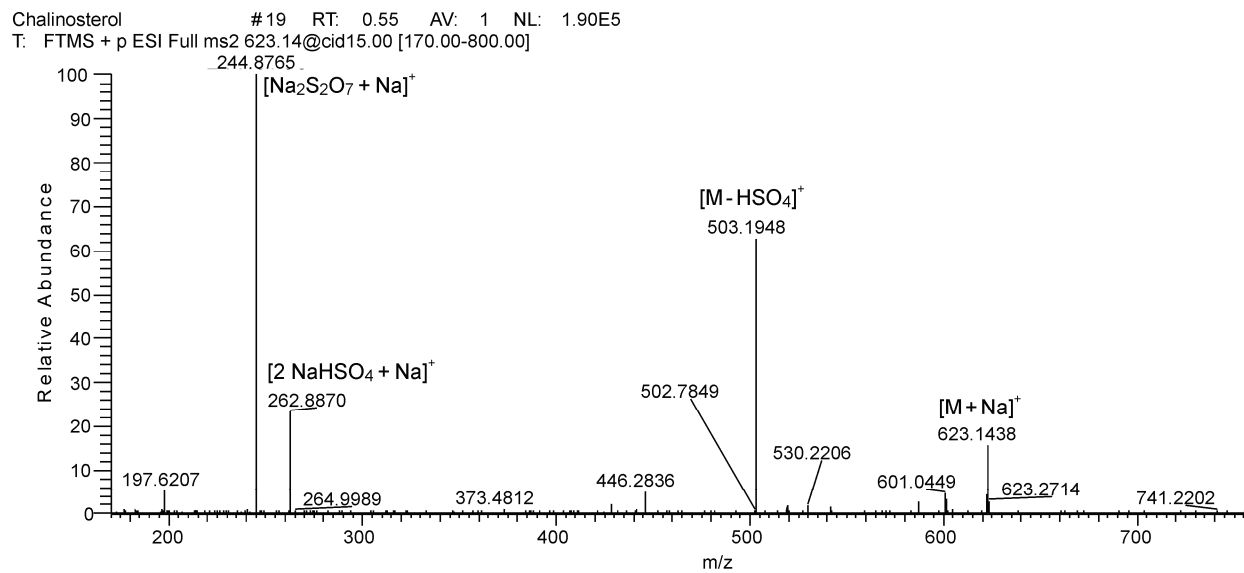

Figure S3. Positive-ion ESI MS/MS spectrum of chalinulasterol (1), parent ion at  $m/z$  623

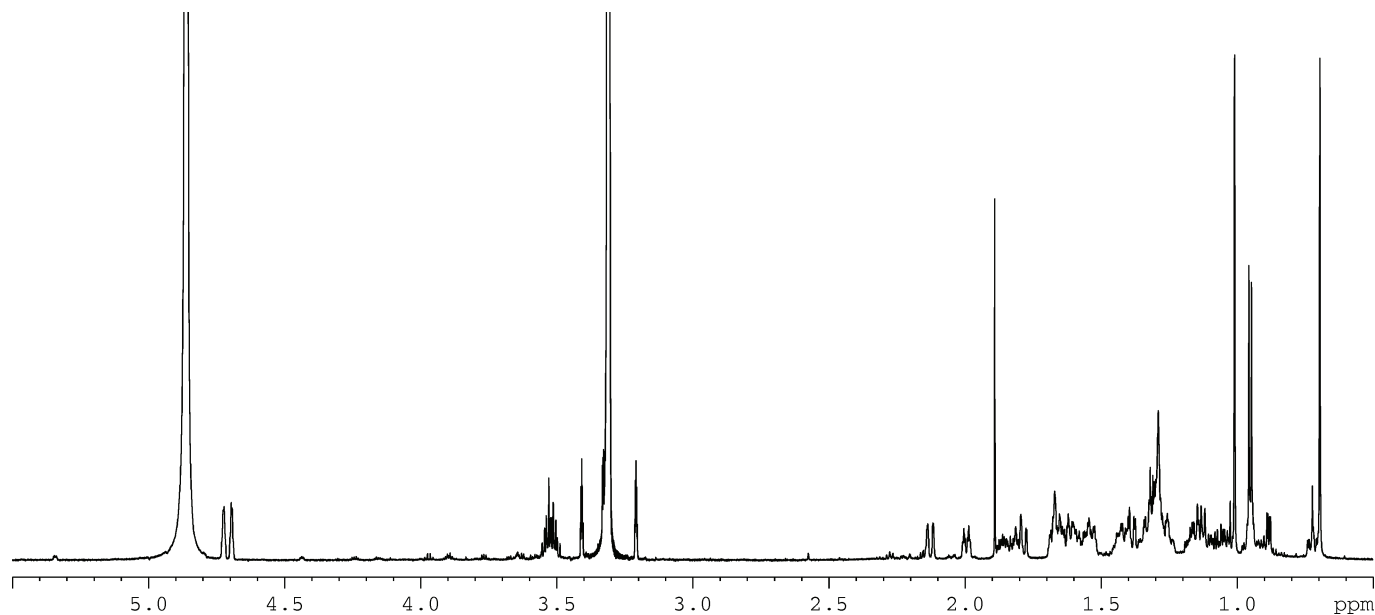

Figure S4.  $^1\text{H}$  NMR spectrum of chalinulasterol (1) ( $\text{CD}_3\text{OD}$ , 700 MHz)

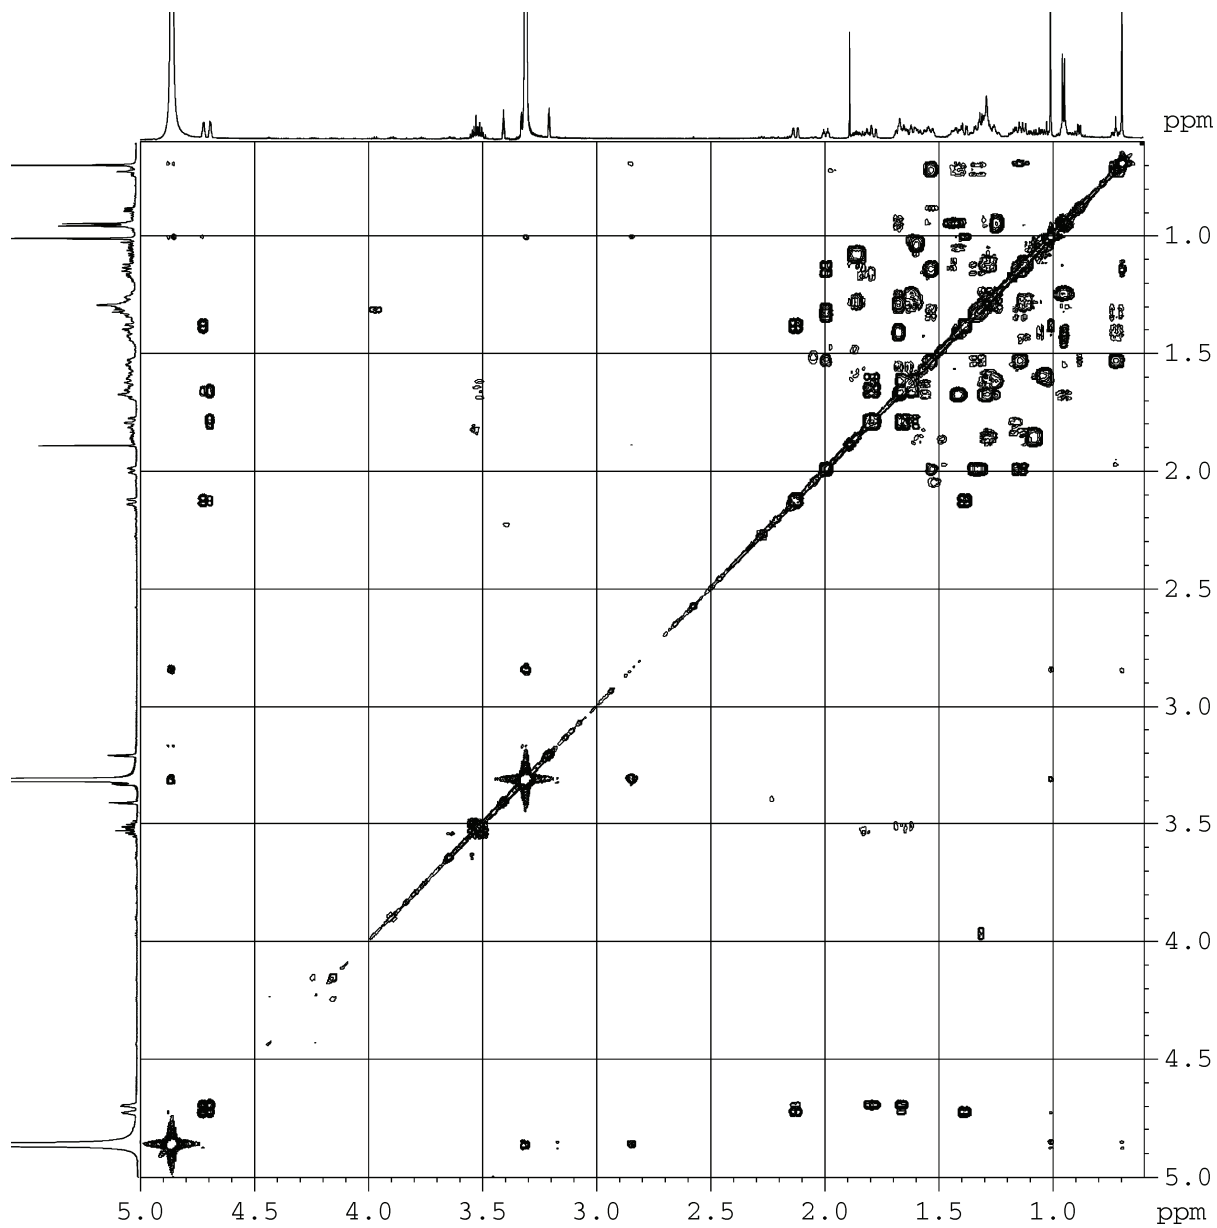

Figure S5. COSY spectrum of chalinulasterol (**1**) ( $\text{CD}_3\text{OD}$ , 700 MHz)

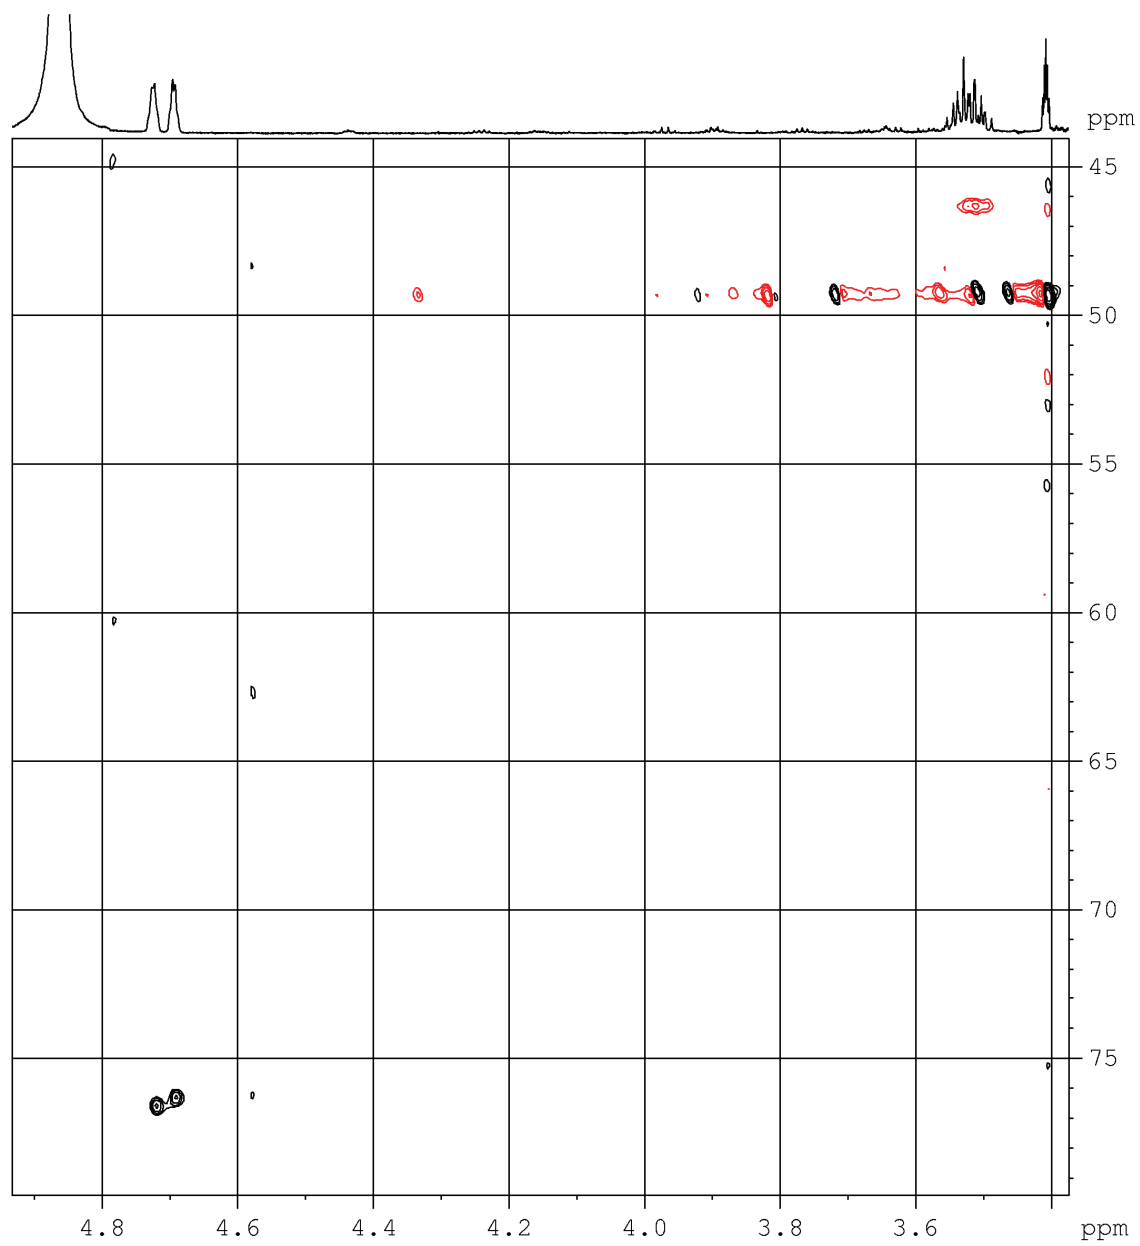

Figure S6. HSQC spectrum of chalinulasterol (**1**) (CD<sub>3</sub>OD, 700 MHz) – low-field region

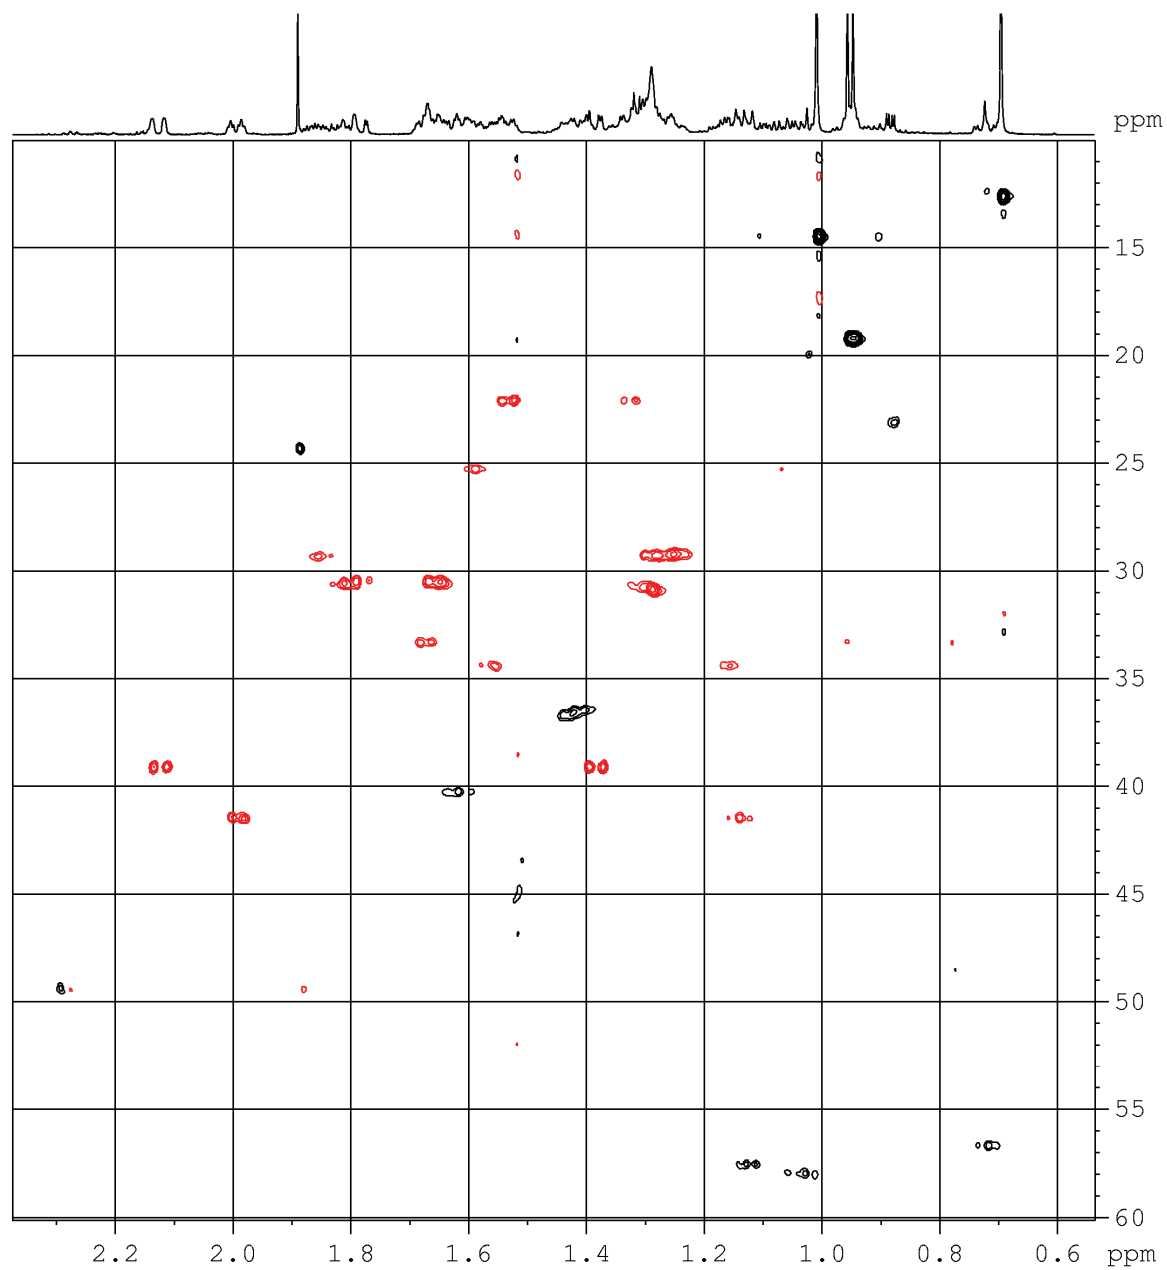

Figure S7. HSQC spectrum of chalinulasterol (**1**) (CD<sub>3</sub>OD, 700 MHz) – high-field region

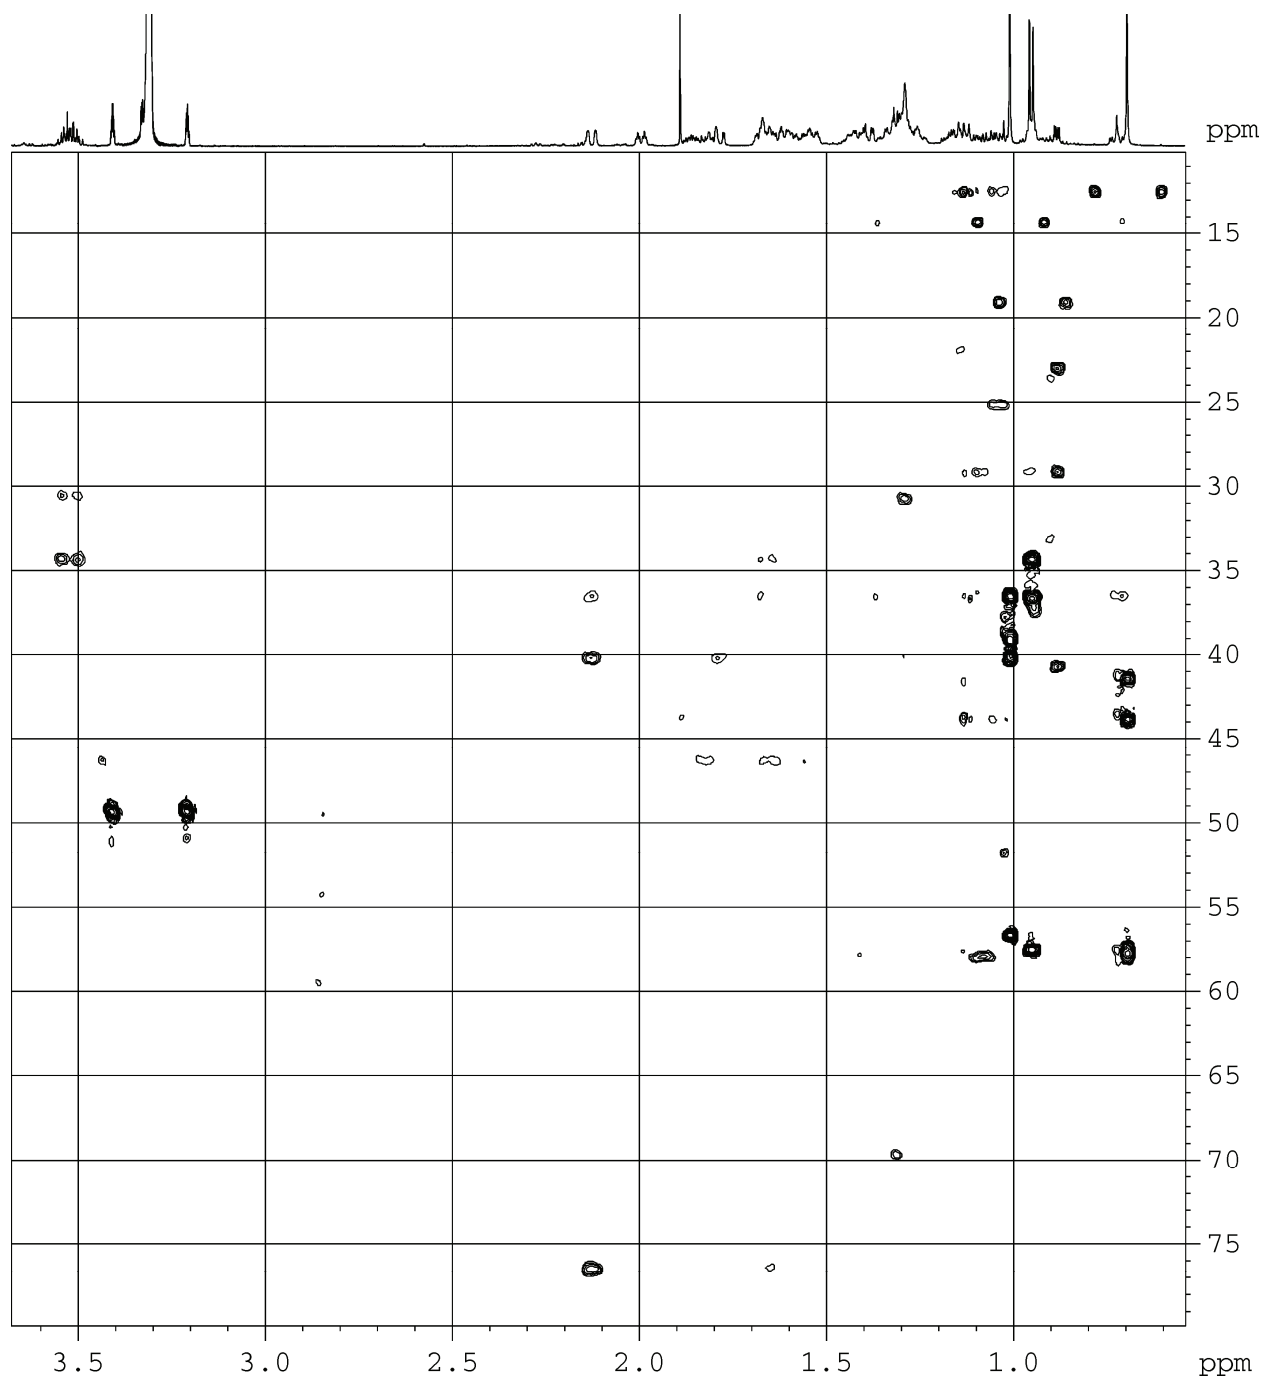

Figure S8. HMBC spectrum of chalinulasterol (**1**) (CD<sub>3</sub>OD, 700 MHz)

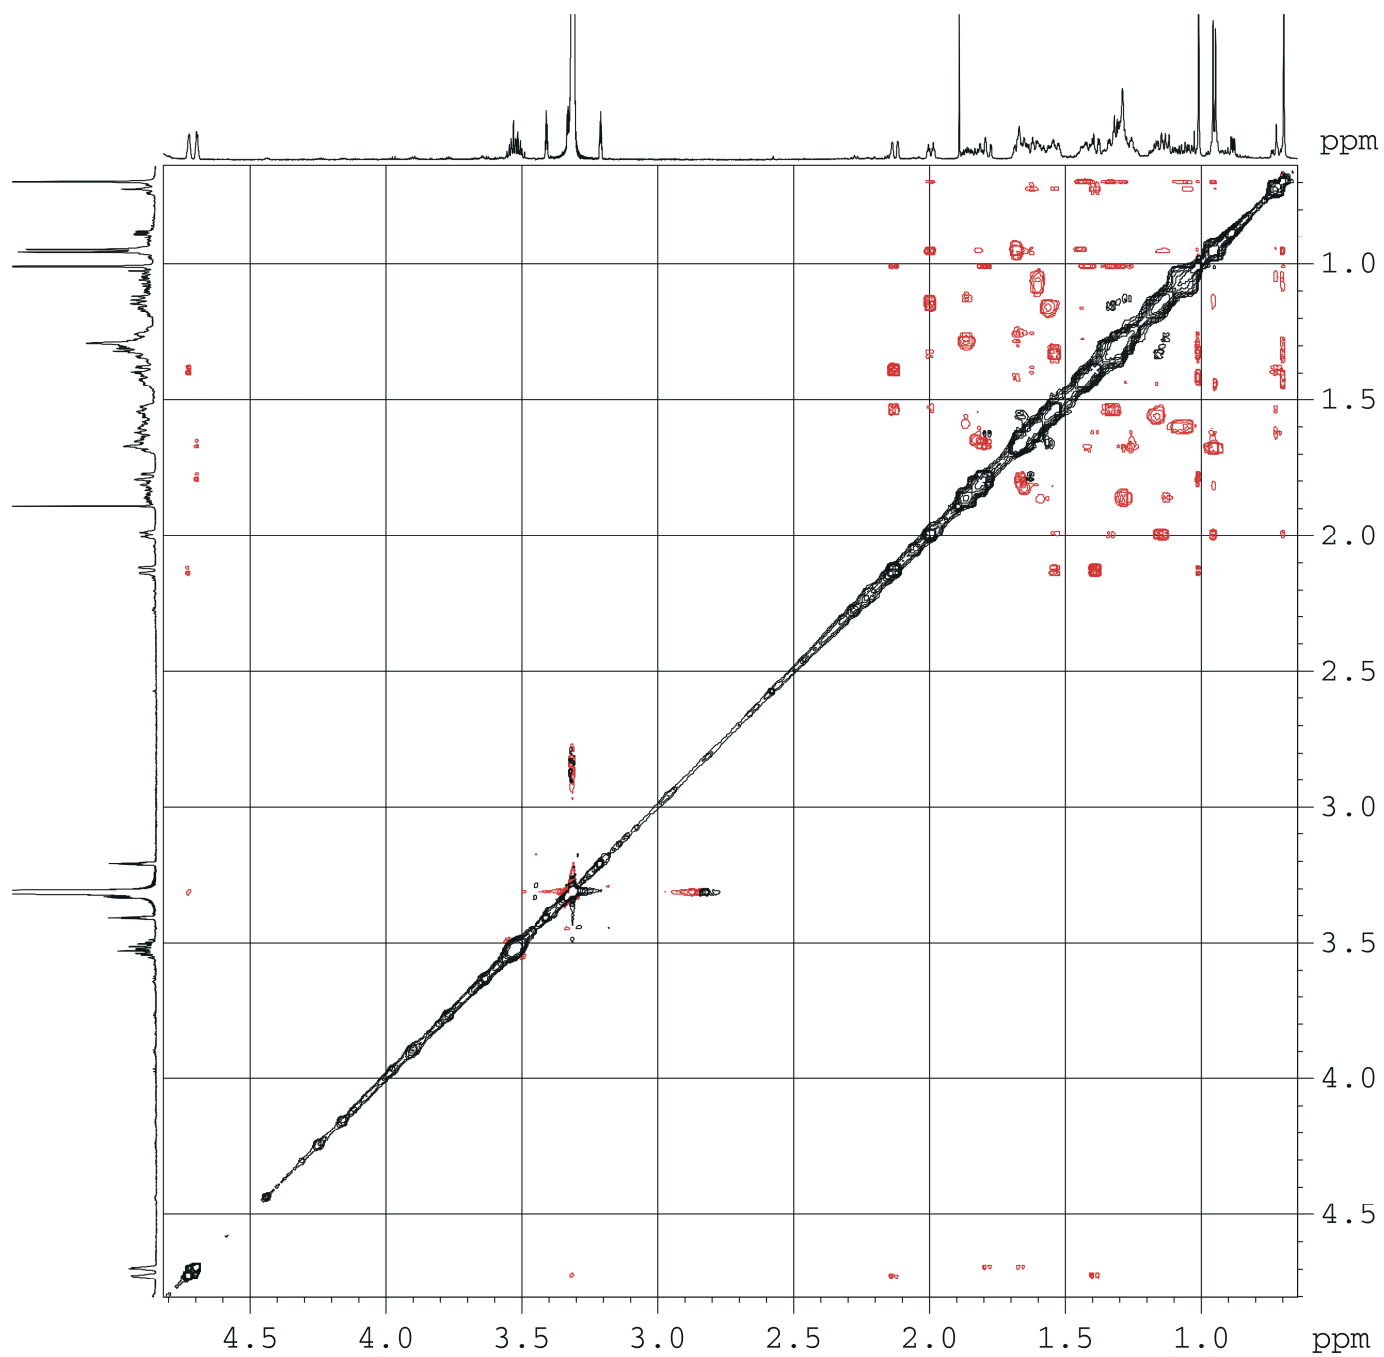

Figure S9. ROESY spectrum of chalinulasterol (**1**) ( $\text{CD}_3\text{OD}$ , 700 MHz)
